# Supplementary material for: Astrocyte immunometabolic regulation of the tumour microenvironment drives glioblastoma pathogenicity
Source: Oxford University Press journal article supplement (doi:10.1093/brain/awac222), 2022-07-28
Supplement: awac222_supplementary_data.pdf [file awac222_supplementary_data.pdf]

# **Astrocyte immunometabolic regulation of the tumor microenvironment drives glioblastoma pathogenicity**

Rita Perelroizen<sup>1,†</sup>, Bar Philosof<sup>1,†</sup>, Noga Budick-Harmelin<sup>2</sup>, Tom Chernobylsky<sup>2</sup>, Ariel Ron<sup>1</sup>, Katzir Rotem<sup>3</sup>, Dor Shimon<sup>2</sup>, Adi Tessler<sup>2</sup>, Orit Adir<sup>2</sup>, Anat Gaoni-Yogev<sup>2</sup>, Tom Meyer<sup>1</sup>, Avivit Krivitsky<sup>2</sup>, Nuphar Shidlovsky<sup>2</sup>, Asaf Madi<sup>4</sup>, Ruppin Eytan<sup>3</sup> and Lior Mayo<sup>1,2\*</sup>

## **Supplementary material:**

1. Supplementary Figures 1-8
2. Supplementary Tables 1-3

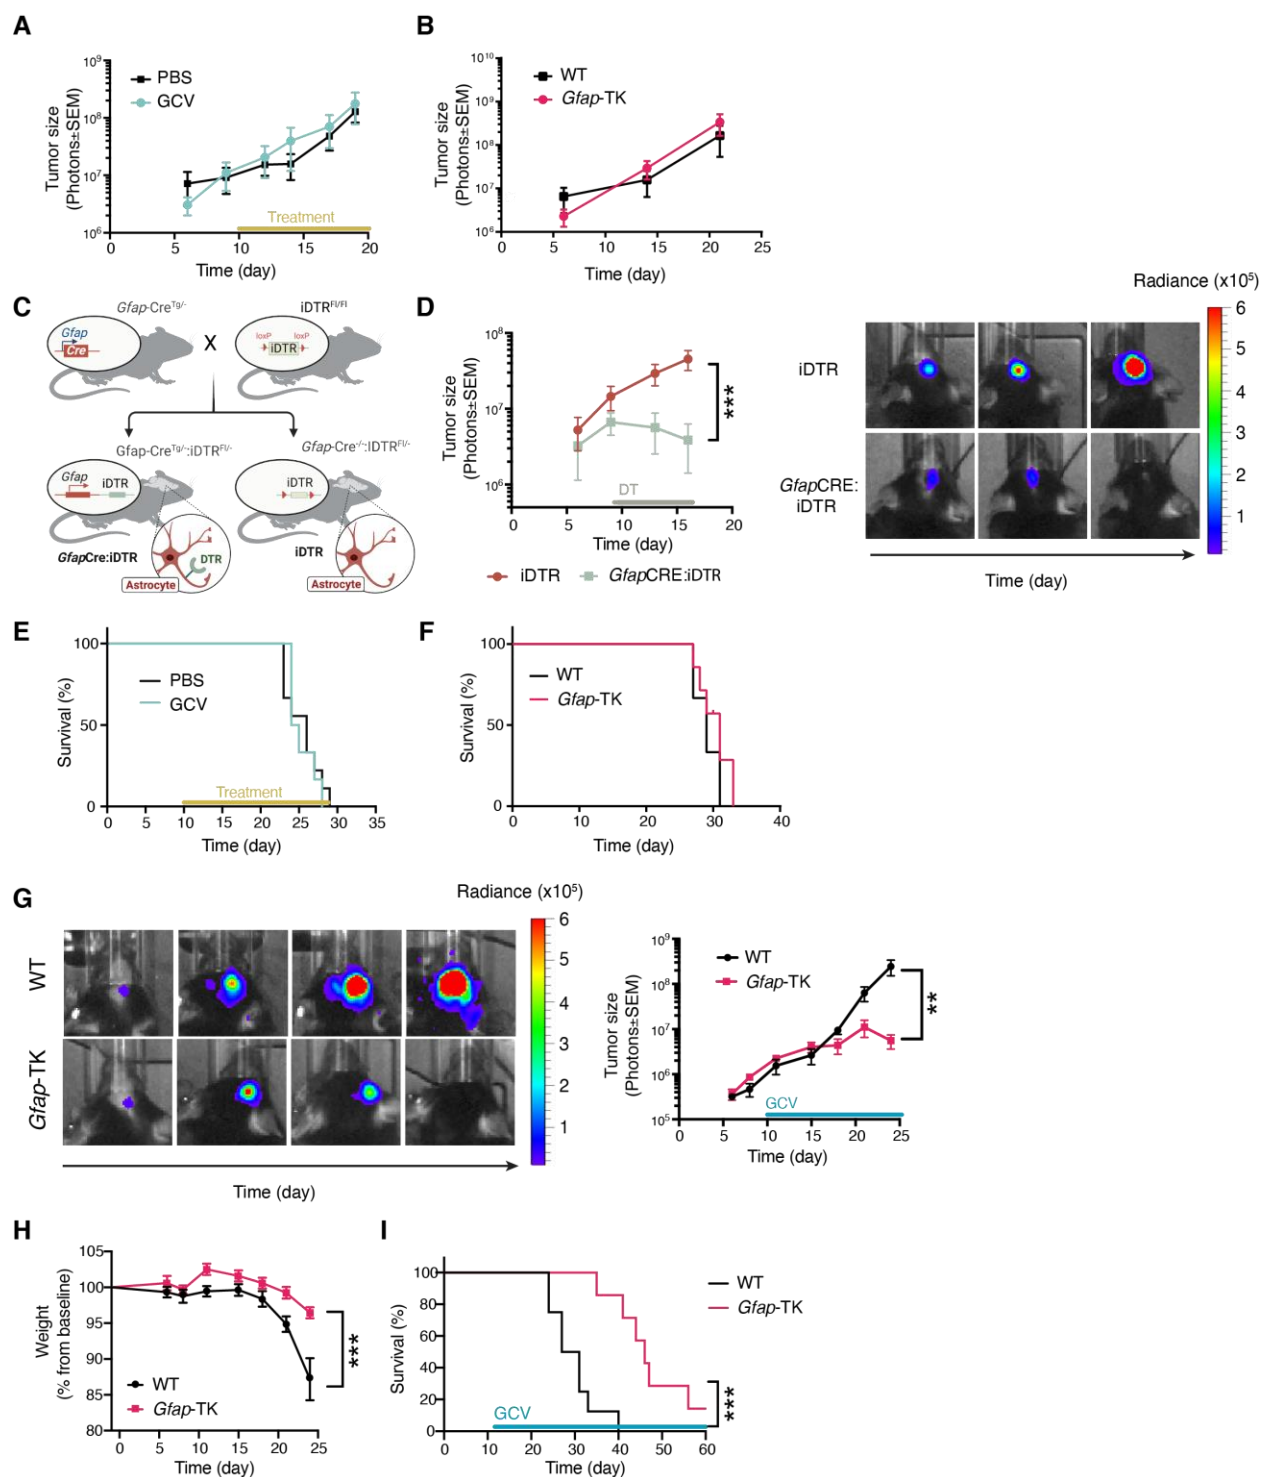

**Supplementary Figure 1. Tumor-associated astrocyte depletion halts glioblastoma progression.** (A-B) Tumor size of GL261-bearing mice as determined by bioluminescence imaging. A, GL261 cells were intracranially implanted into WT mice. GBM-bearing mice were treated daily with Ganciclovir (GCV, 25mg/kg) or vehicle (PBS) from day 10 until the

experimental end. Data are representative of two independent experiments with  $n = 8$  mice/group. **(B)** GL261 cells were intracranially implanted into WT or *Gfap*-TK mice. Data are representative of two independent experiments with  $n = 7$  mice/group. **(C)** *Gfap*CRE:iDTR breeding scheme. Mice in which the expression of the DT receptor (DTR) from a ubiquitously active promoter is prevented by a loxP-flanked stop cassette (iDTR)<sup>1</sup> were crossed with transgenic mice expressing the Cre recombinase under the control of the GFAP promoter to generate *Gfap*CRE:iDTR mice, in which DTR expression is limited to GFAP<sup>+</sup> astrocytes, resulting in their depletion following DT-A administration<sup>2</sup>. **(D)** iDTR or *Gfap*CRE:iDTR littermates, were intracranially implanted with GL261. Ten days later mice were treated daily with DT-A (1100ng/mice nasally). Tumor size was analyzed by bioluminescence imaging. Data are representative of two independent experiments with  $n = 7$  mice/group. **(E-F)** Kaplan-Meier curves assess the overall survival of mice from **A** and **B**, respectively. **(G-I)** Astrocyte ablation halts CT-2A glioma pathogenicity. CT-2A glioma cells were intracranially implanted into WT or *Gfap*-TK littermates and treated with GCV as in **(Fig 1D)**. Tumor growth was analyzed by bioluminescence imaging **(G)**, and mice weight loss and survival were monitored **(H and I, respectively)**. Data in **A,B,D,G, and H** are shown as mean  $\pm$  s.e.m. *P* values were determined by two-way ANOVA (**A,B,D,G, and H**) or Log rank (Mantel-Cox) test (**E,F and I**). \*\* $P < 0.01$ , \*\*\* $P < 0.001$ .

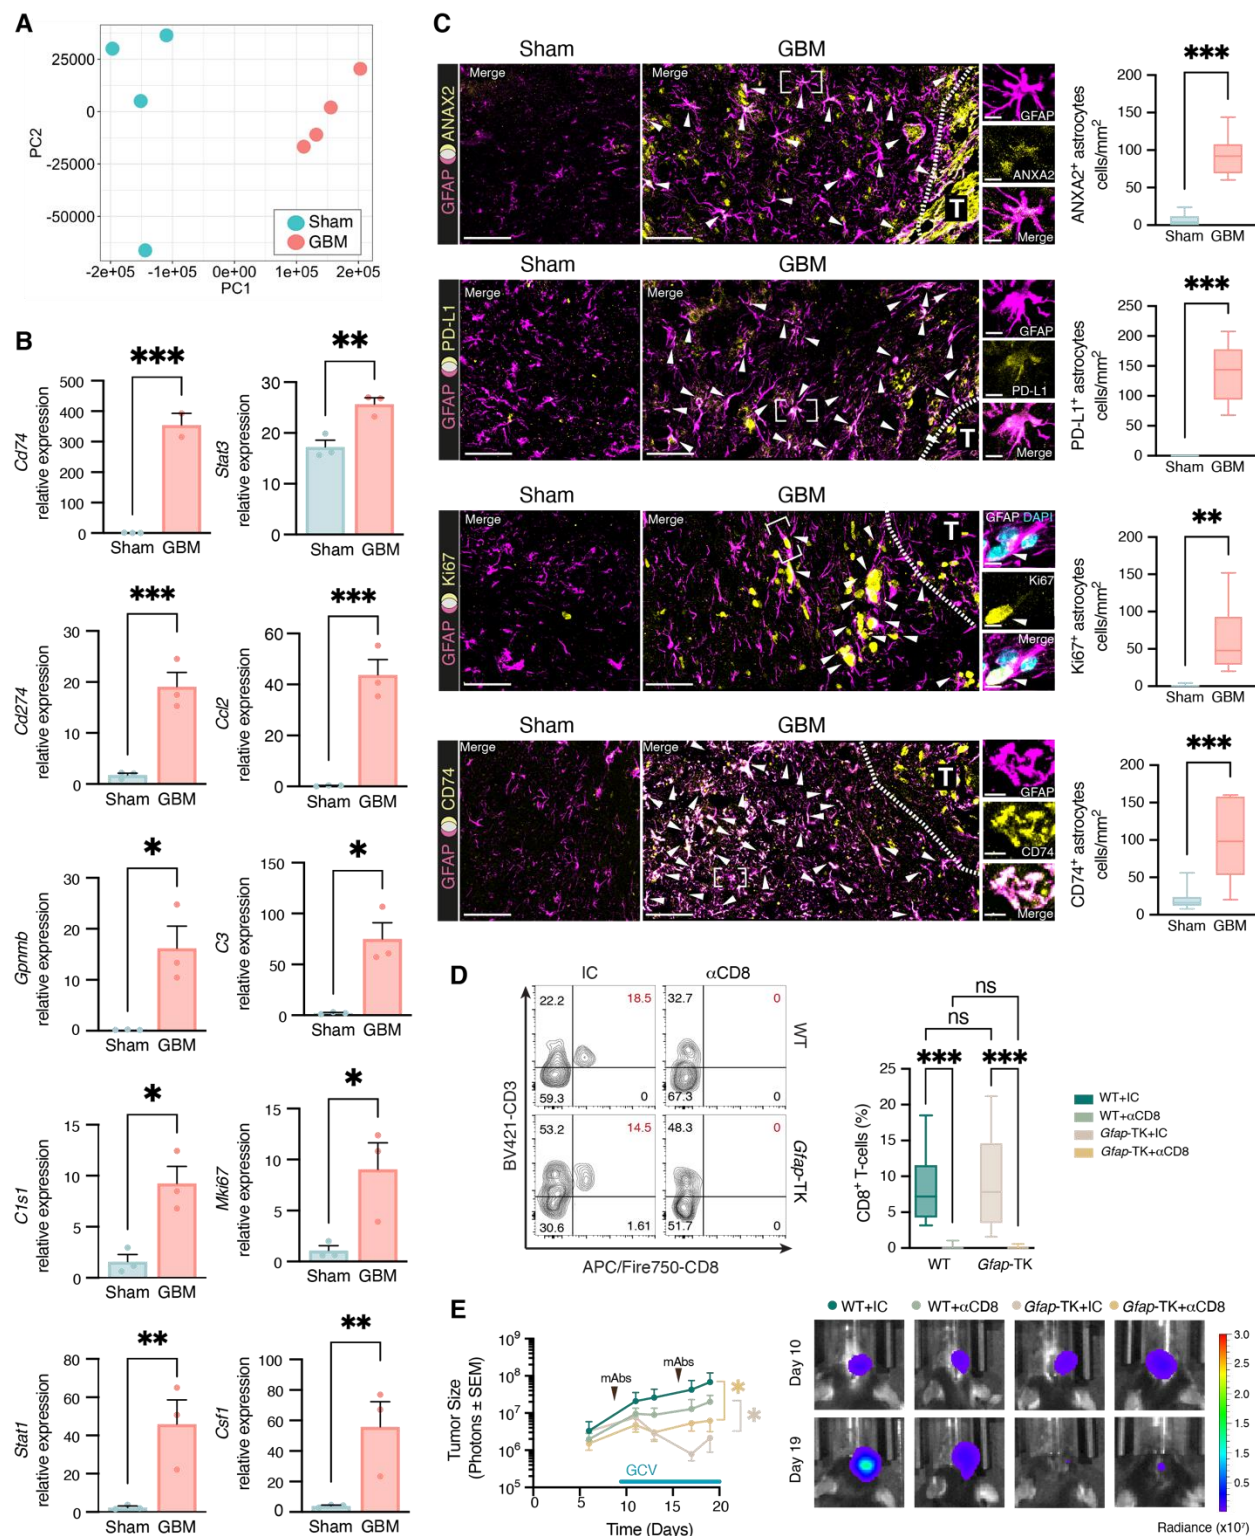

**Supplementary Figure 2. Transcriptomic analysis of tumor-associated astrocytes.** (A) PCA of differentially regulated genes of RiboTag-isolated astrocytes (as in Fig 2) from PBS-injected mice (Sham, pink) or GL261 GBM-bearing mice (GBM, blue). PC1 was associated with the

variance within the *sham* and *GBM* data sets, whereas PC2 was associated with the variance between each group. **(B)** Validation of RNA seq data in different biological samples. qPCR analysis of *Cd274*, *Ccl2*, *Stat1*, *Cd74*, *Stat3*, *Csf1*, *Gpnmb*, *C3*, *C1s1*, and *Mki67* expression in RiboTag-isolated astrocytes from sham-injected or GBM-implanted injected mice; expression normalized to *Ppia*. Data are representative of 3 independent experiments ( $n = 3$  biologically independent samples). Data are shown as mean  $\pm$  s.e.m. **(C)** Immunohistochemistry analysis of GFAP (magenta) co-localization with Annexin A2 (ANXA2, yellow), PD-L1 (yellow), Ki67 (yellow), or CD74 (yellow) of sham-injected or GBM-bearing mice. Representative images on the left, box-plot analysis of the antigen-positive astrocytes per  $\text{cm}^2$  ( $n = 9$ ), on the right. Scale bars, 500  $\mu\text{m}$  (left), 5  $\mu\text{m}$  (right). Co-localization (white) is identified by white arrowheads. Data are shown as median, interquartile interval, minimum, and maximum values. **(D,E)** CD8<sup>+</sup> T-cell depletion in WT or *Gfap*-TK mice GBM-bearing mice. GL261 cells were intracranially implanted, and the mice were treated daily with GCV from day 9 until the experimental end (as in Fig 1D), and intraperitoneally injected (black arrows) with CD8 depleting mAbs ( $\alpha\text{CD8}$ ) or isotype control (IC) (0.1 mg/mouse, as in<sup>3</sup>). Representative data of two independent experiments ( $n = 9$  mice/group). **(D)** Analysis of the CD8<sup>+</sup> T-cells frequency in the blood. Representative flow cytometry plots of CD3<sup>+</sup>/CD8<sup>+</sup> staining are shown on the left and quantification analyses of CD8<sup>+</sup> T-cells frequency are on the right. **(E)** Tumor size of GL261-bearing mice as determined by bioluminescence imaging. *P* values were determined by two-sided Student's t-tests **(B,C)** or two-way ANOVA **(D,E)**. \* $P < 0.05$ , \*\* $P < 0.01$ , \*\*\* $P < 0.001$ .

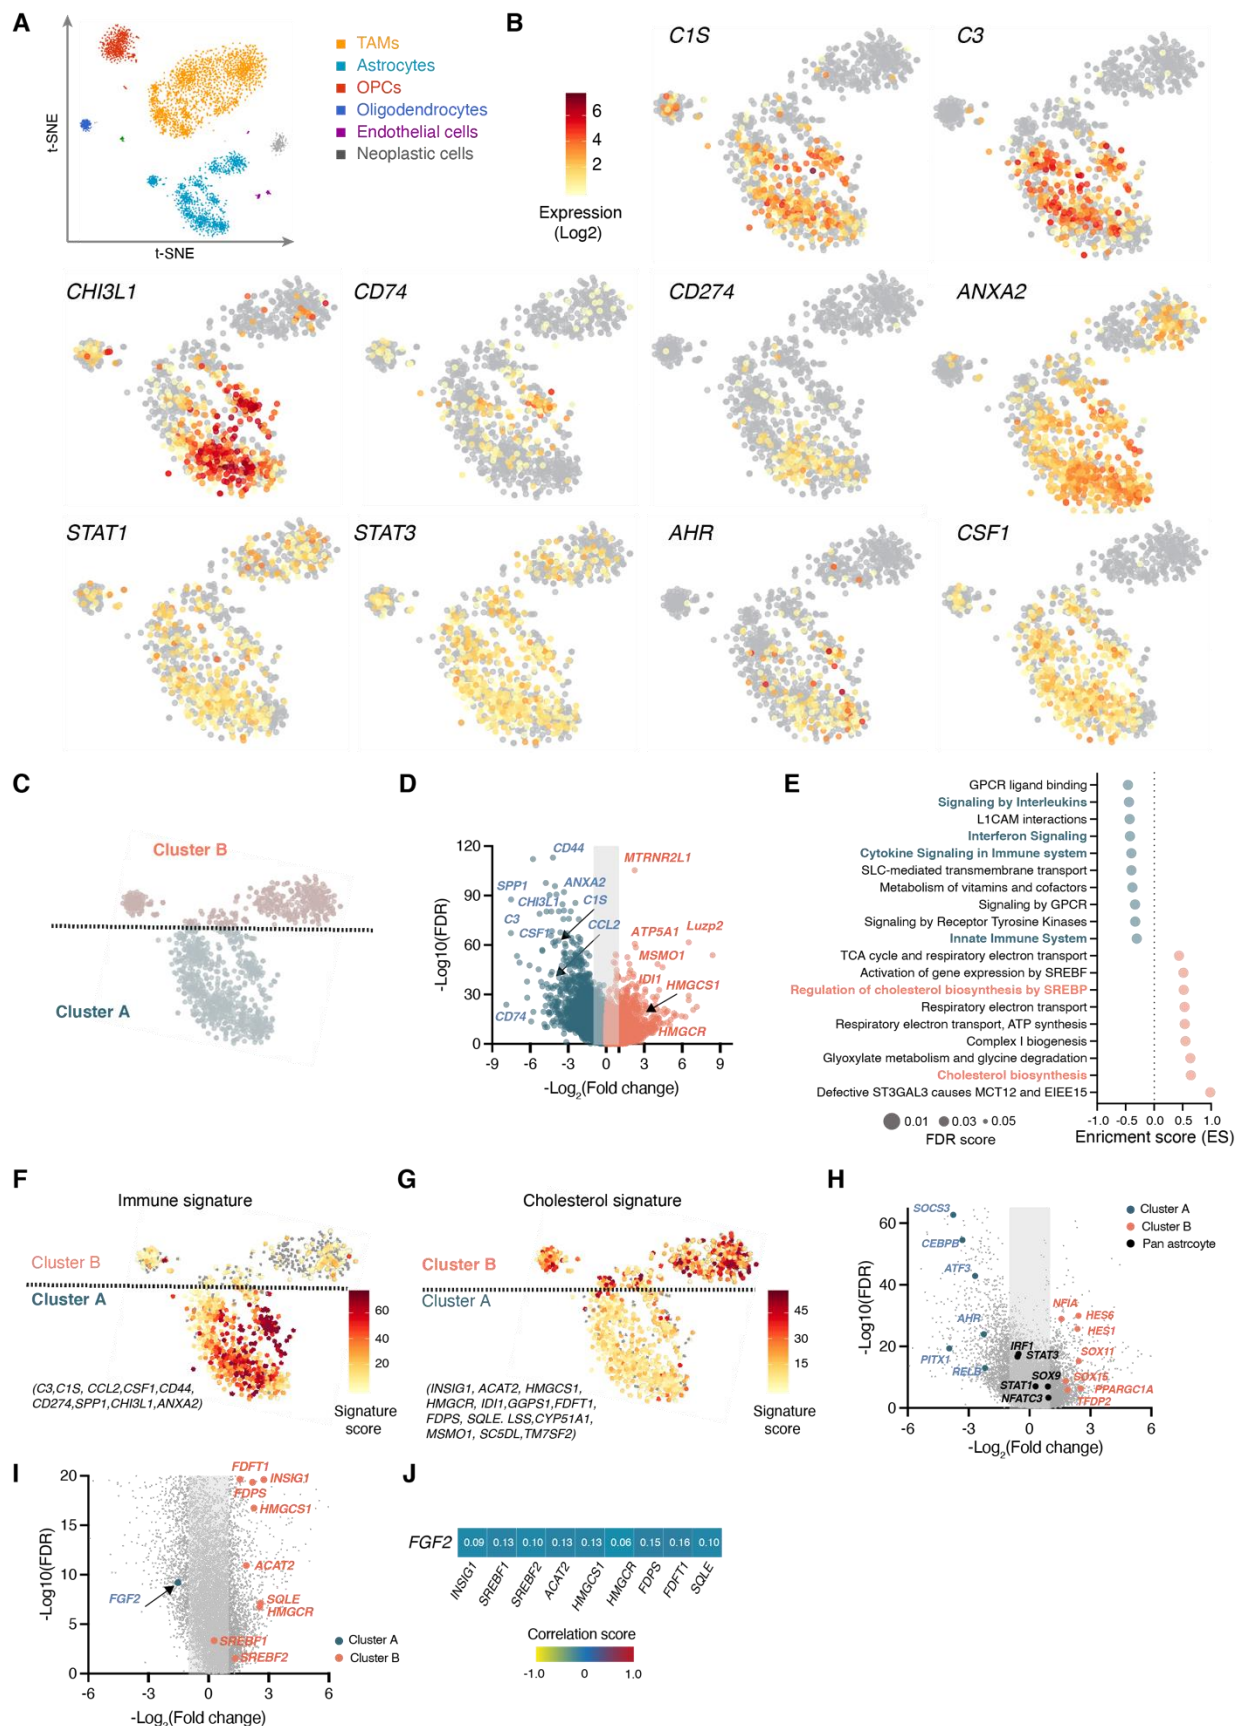

**Supplementary Figure 3. Transcriptomic analysis of human tumor-associated astrocytes (A, B)** Analysis of single-cell data of the tumor microenvironment of IDH1<sup>neg</sup> grade IV GBM patients performed on data by Darmanis et. al<sup>4</sup>. **(A)** unbiased clustering of the TAMs (1842 cells, orange), TAAs (1052 cells, light blue), oligodendrocyte precursor cells (OPCs, 406 cells, red), oligodendrocytes (81 cells, dark blue), and endothelial cells (50 cells, purple), neurons (21, green) and neoplastic cells (137, gray) defined based on the expression of known markers<sup>5-7</sup>), presented as color-coded TSNE plot. **(B)** Heat map overly of the scRNAseq gene expression intensity within the astrocyte cluster of *C1S*, *C3*, *CHI3L1*, *CD74*, *CD274*, *ANXA2*, *STAT1*, *STAT3*, *AHR*, and *CSF1*. Expression levels are defined by color-coded expression as indicated (from yellow to red; gray coloring indicates that the transcript was not detected). **(C-H)** Analysis of astrocyte diversity. **(C,D)** Sub clustering of astrocytes based on differential expression. **(C)** Color-coded TSNE plot of cluster A (Blue, 599 cells) and cluster B (Pink, 453 cells). **(D)** Volcano plot of gene expression in astrocytes, color-coded by the cluster enrichment. **(E)** Top 20 Functional enrichment pathways (FDR<0.05) in the astrocyte clusters, color-coded by the cluster enrichment. **(F,G)** Heat map overly of the scRNAseq gene expression intensity of astrocyte immune and cholesterol signatures **(F and G, respectively)**. Expression levels in heatmaps are color-coded (from yellow to red; Grey indicates that the transcript was not detected). Genes associated with each signature are stated at the bottom of the corresponding heat map. Signature score is defined as the sum of all relevant transcripts per cell. **(H)** Expression levels overlay of significant (FDR<0.001) transcription factors on volcano plot from **(D)**, color-coded by association with cluster A (blue), B (pink), or expressed evenly between the two clusters (pan-astrocyte expression, black). **(I,J)** Analysis of *FGF2* expression and its correlation to cholesterol synthesis genes (*INSIG1*, *SREBF1*, *SREBF2*, *ACAT2*, *HMGCS1*, *HMGCR*, *FDPS*, *FDFT1*, and *SQLE*), which are regulated by astrocyte cell density<sup>8</sup>. **(I)** Heat map overly of the transcripts expression levels in the astrocytes, color-coded by their cluster association (as in **H**). **(J)** Heat map of the Jaccard correlation index between *FGF2* transcript to the cholesterol synthesis genes. Correlation score is noted within each cell. Correlation is color-coded [negative (yellow) , natural (blue) and purple (positive)].



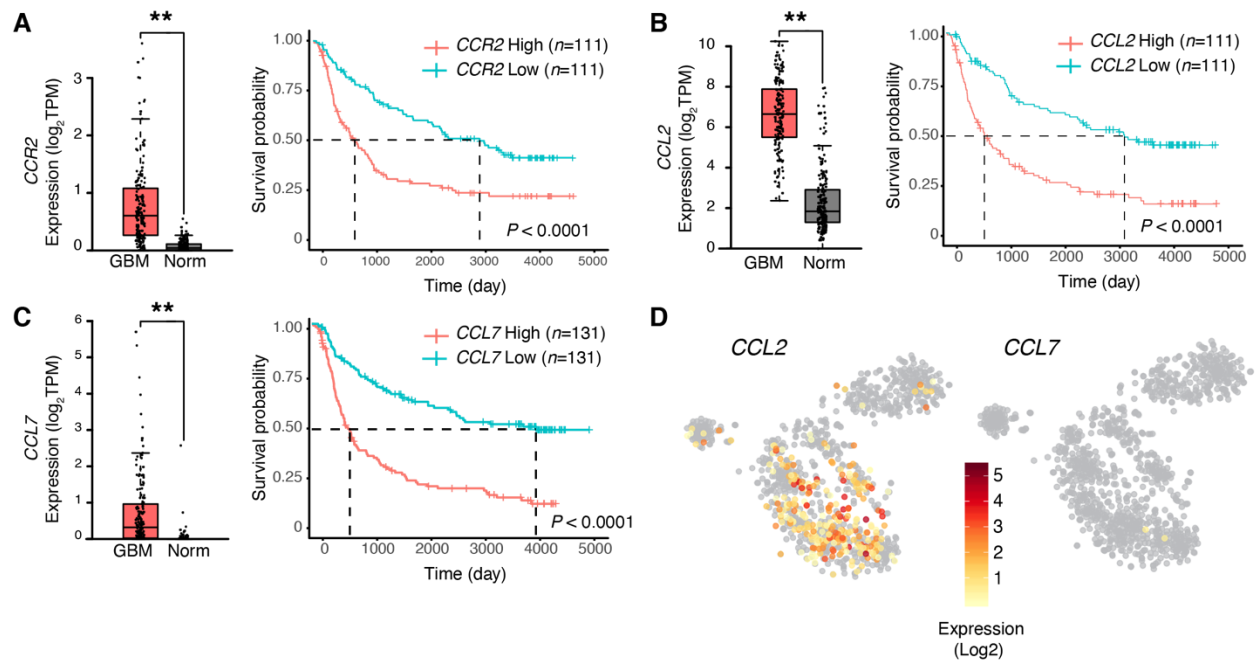

**Supplementary Figure 4. Analysis of CCR2 pathway in human GBM.** (A-C) Analysis of gene expression (Box plots, left panel; n=163 GBM patients and 207 normal controls) and survival correlations (Kaplan-Meier Curve, right panel; n as indicated) for *CCR2* (A), *CCL2* (B) and *CCL7* (C). *n* represents the number of patients per group. Data are shown as mean  $\pm$  s.e.m. *P* values were determined by or two-sided Student's (*t*-test, \**P*<0.01) or Log-rank (Mantel-Cox) tests (survival, *P*<0.0001). (D) Heat map over the scRNAseq gene expression intensity of *CCL2*, and *CCL7* in tumor-associated astrocyte cluster of GBM patients<sup>4</sup> (as in **Supplementary Fig 3B**). Expression levels are defined by color-coded expression (from yellow to red; Grey indicates that the transcript was not detected).



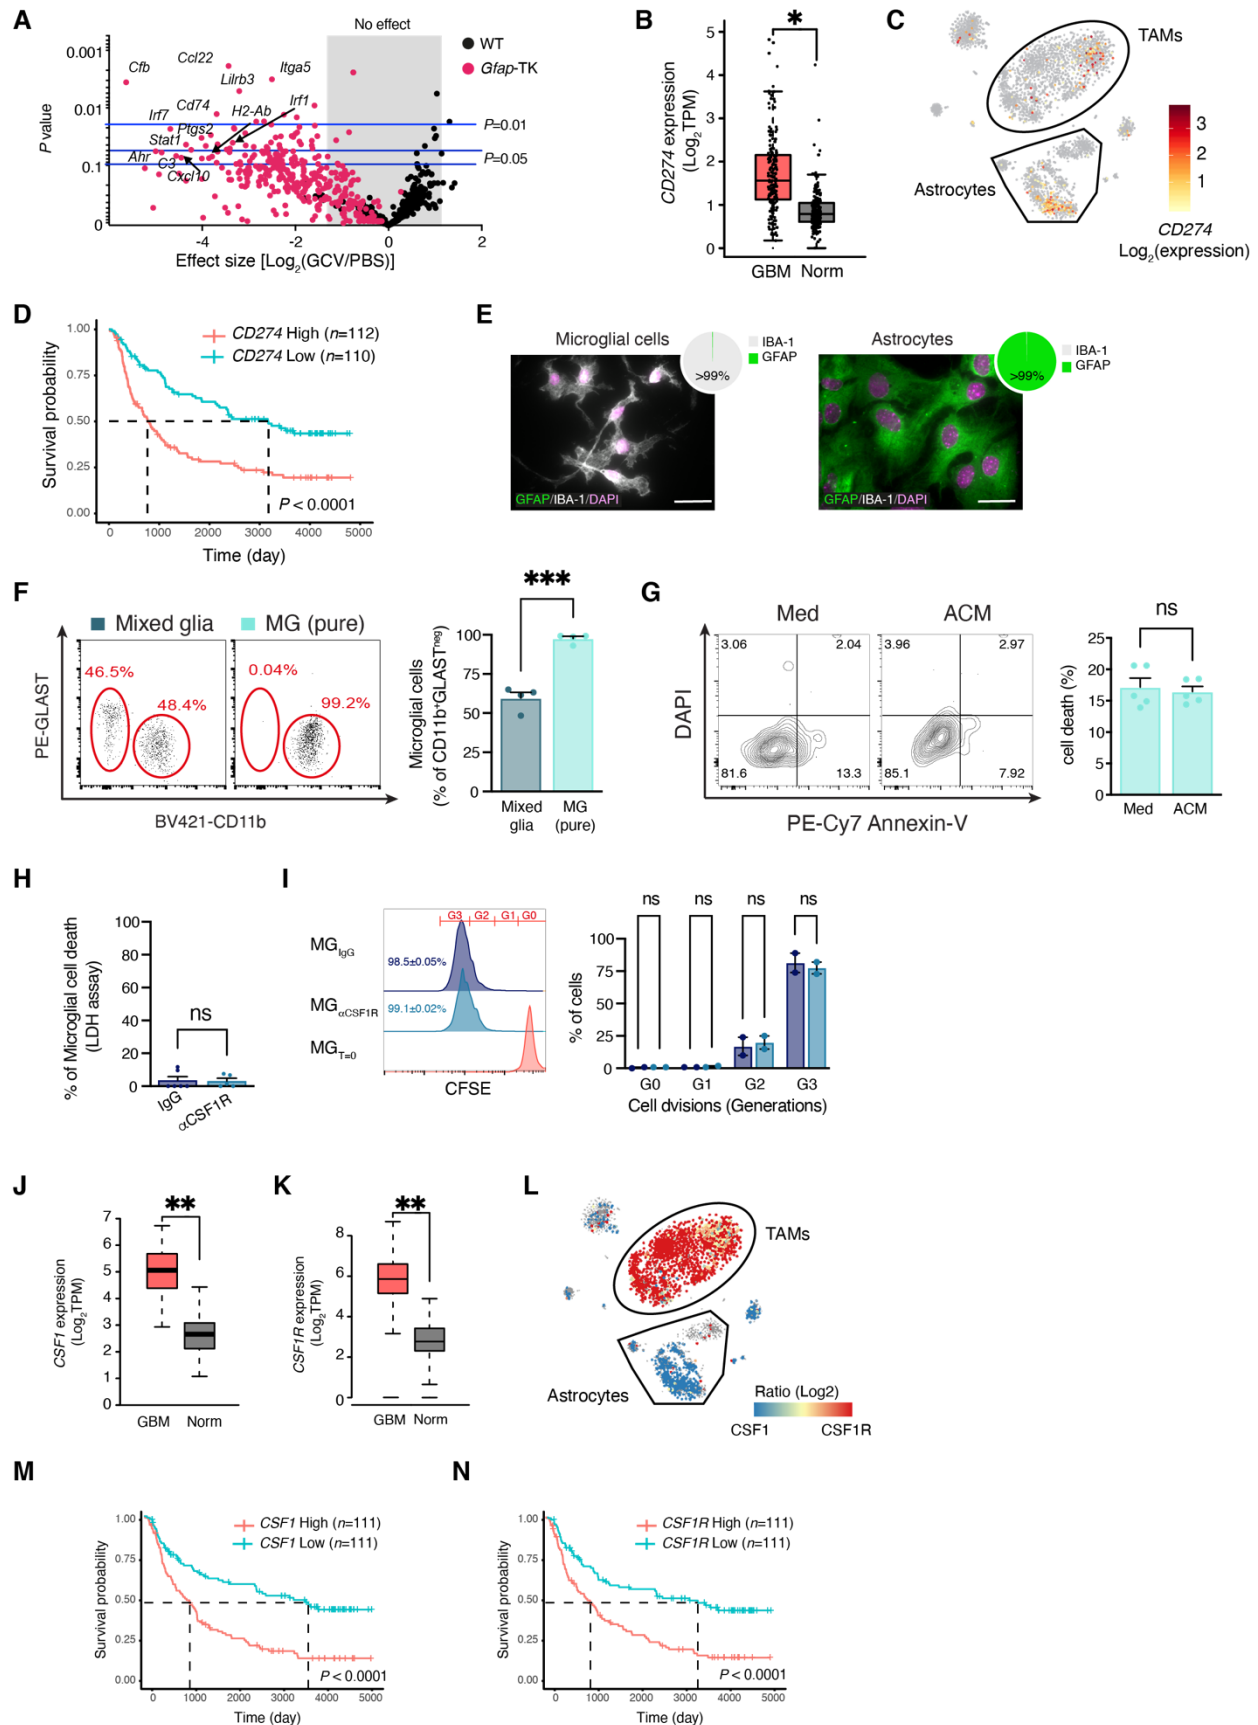

**Supplementary Figure 5. Profile of Tumor-associated Macrophages in Glioblastoma.** (A) Volcano plot of differential gene expression in FACS-sorted TAMs from GCV-treated WT (black) and *Gfap*-TK (pink) GL261-bearing mice. (B) Box plot analysis of TCGA data of CD274 gene expression in GBM ( $n=163$ ) and normal (Norm;  $n=207$ ) patients. (C) Heat map overlay of the scRNAseq gene expression intensity of CD274 in GBM patients<sup>4</sup> (TAM and TAA clusters areas in **Supplementary Fig 3A**). Expression levels are defined by color-coded expression (from yellow to red; Grey indicates that the transcript was not detected). (D) Kaplan-Meier curves assessing overall survival of GBM patients based on CD274 expression; n represent the number of patients per group. (E) Representative fluorescent images of primary mouse microglial cells (left) and primary astrocytes, stained for GFAP (green), IBA-1 (white), and nuclei (DAPI, magenta). scale bars, 20  $\mu$ m (F) Mixed glial cultures were left untreated or subject to mild trypsinization<sup>9</sup>, isolating the microglial cells [MG (pure)]. Representative flow cytometry plots of CD11b/GLAST staining from each group are shown on the left and quantification analyses of CD11b<sup>+</sup> microglial cell frequencies are on the right ( $n = 4$  biologically independent experiments). Data are shown as mean  $\pm$  s.e.m.  $P$  values were determined by or two-sided Student's t-test (\*\*\*,  $P<0.001$ ). (G) Pure microglial cultures were prepared, treated with astrocytes conditioned medium (ACM) or control medium (Med), and co-cultured with GFP<sup>+</sup>-GL261 cells for 48h (as in **Fig 4G**). Representative flow cytometry plots of GFP-gated GL261 cells from each group are shown on the left, and quantification analyses of cell death are on the right ( $n = 2$  biologically independent experiments). Data are shown as mean  $\pm$  s.e.m.  $P=0.678$  by two-sided Student's t-test. (H,I) pure microglial cultures were prepared, treated, and co-incubated with isotype control or CSF1R blocking mAbs (25 $\mu$ g/ml) for 48h, as in (**Fig 4K**). Microglial cell death and proliferation were then analyzed by LDH assay (H) and CellTrace™ Violet staining (I). Representative flow cytometry plots are shown on the left and quantification analyses of the percentage of proliferating cells in each generation are on the right ( $n = 2$ ). Data are representative of two independent experiments. Data are shown as mean  $\pm$  s.e.m.  $P$  values were determined by two-sided Student's t-test;  $P= 0.89$  (H), or Two-way ANOVA, followed by Fisher's LSD post-hoc analysis;  $P>0.99$  (I), ns, not significant. Box plot analysis of TCGA data of CSF1 (J) and CSF1R (K) gene expression in GBM ( $n=163$ ) and normal (Norm;  $n=207$ ) patients. (L) Heatmap overlay of CSF1/CSF1R ratio in the GBM TME, based on scRNAseq gene expression<sup>4</sup>. Ratio intensity is present by color; Blue – only CSF1 expressing cells, Yellow – the dual expression of CSF1 and CSF1R, and Red – cells that

only express CSF1R. (**M,N**) Kaplan-Meier curves assessing overall survival of GBM patient based on CSF1 and CSF1R expression; n represent the number of patients per group. Data are shown as mean  $\pm$  s.e.m. *P* values were determined by or two-sided Student's t-test (expression data, \**P*<0.01) or Log rank (Mantel-Cox) tests (survival, *P*<0.0001).

**A**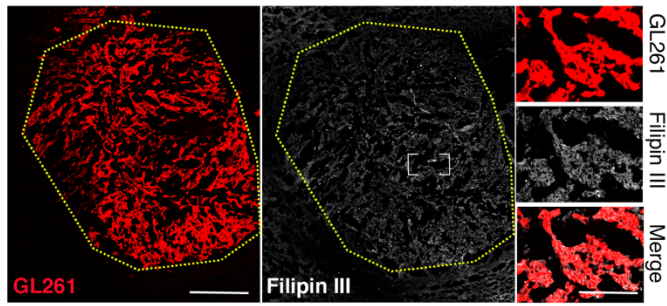**B**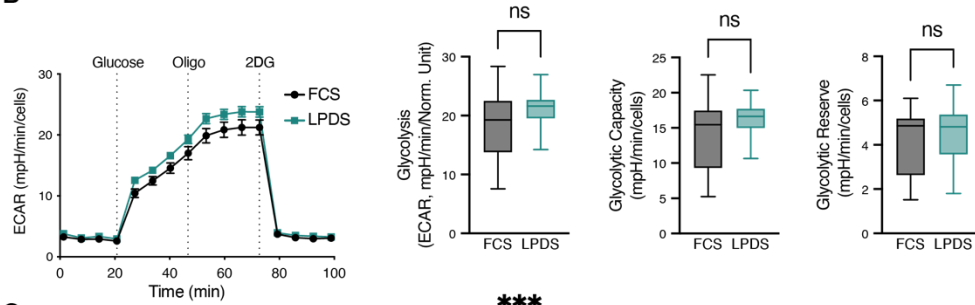**C**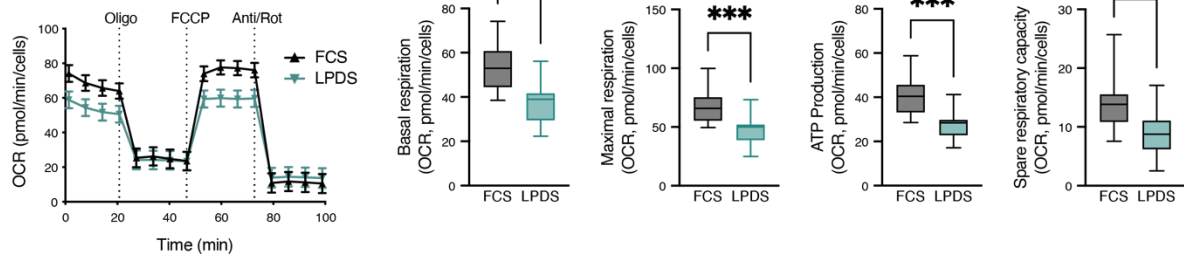**D**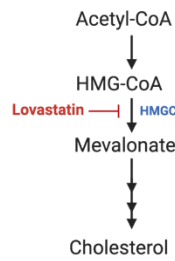**E**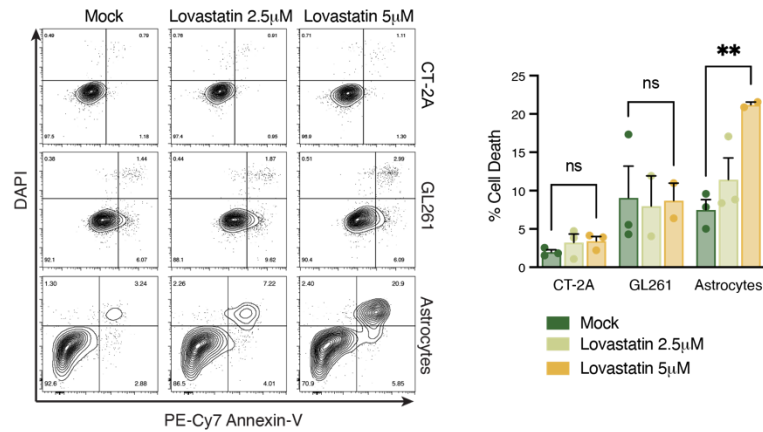**F**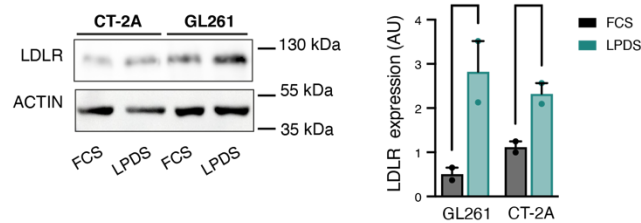**G**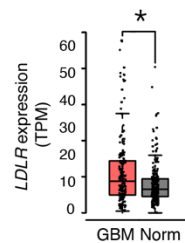

**Supplementary Figure 6. Astrocyte-derived cholesterol support glioma survival.** (A) Representative immunofluorescence images of cholesterol accumulation (Filipin III, white) in the GBM tumor (tdTomato+ GL261 cells, red), Tumor margins are indicated in yellow ( $n = 3$  biologically independent samples). Scale bars, 400  $\mu\text{m}$  (right), 150  $\mu\text{m}$  (left). (B,C) Real-time changes in the ECAR (B) and OCR (C) of CT-2A glioma cells, cultured in media supplemented with full serum (FCS) or lipoprotein-deprived serum (LPDS) for 18 h and measured using Seahorse. Oligo, oligomycin; FCCP, carbonyl cyanide4-(trifluoromethoxy) phenylhydrazine; R/A, rotenone plus antimycin A; 2-DG, 2-deoxy-d-glucose. Glycolysis, glycolytic capacity and glycolytic reserve are extracted from ECAR reading, and basal respiration, ATP production, Maximal respiration, and spare respiratory capacity were determined based on OCR. Data are representative of two independent experiments ( $n = 6$  technical replicates per experiment). (D) Scheme of cholesterol synthesis inhibition by HMGCR-inhibitor lovastatin. (E) Representative flow cytometry plots and quantification analyses of Annexin V/DAPI staining comparing astrocytes with CT-2A and GL261 cells after a 3-day treatment with the lovastatin. ( $n = 3$  biologically independent experiments). (F) Representative immunoblot and quantification analyses comparing LDLR protein levels in with CT-2A and GL261 cells cultured for 2 days in FCS or LPDS supplemented media. ( $n = 3$  biologically independent experiments). (G) Box plot analysis of TCGA gene expression for *LDLR* in normal ( $n=207$ ) or GBM patients ( $n=163$ ).  $n$  represents the number of patients per group. Data are shown as mean  $\pm$  s.e.m.  $P$  values were determined by two-sided Student's  $t$ -tests (B,C,F and G) or by one-way ANOVA, followed by Fisher's LSD post-hoc analysis (E). \* $P<0.05$ , \*\* $P<0.01$ , \*\*\* $P<0.001$ .

**A**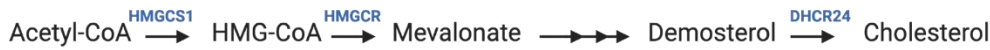**B**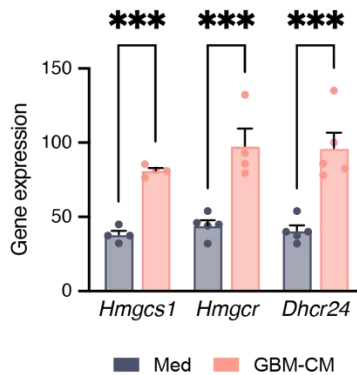**C**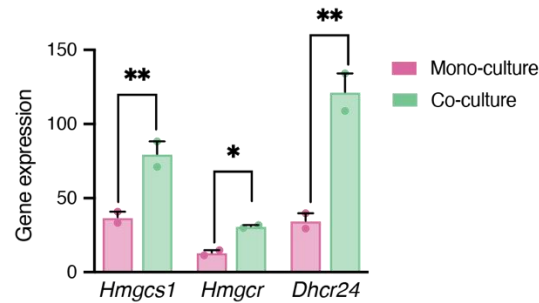**D**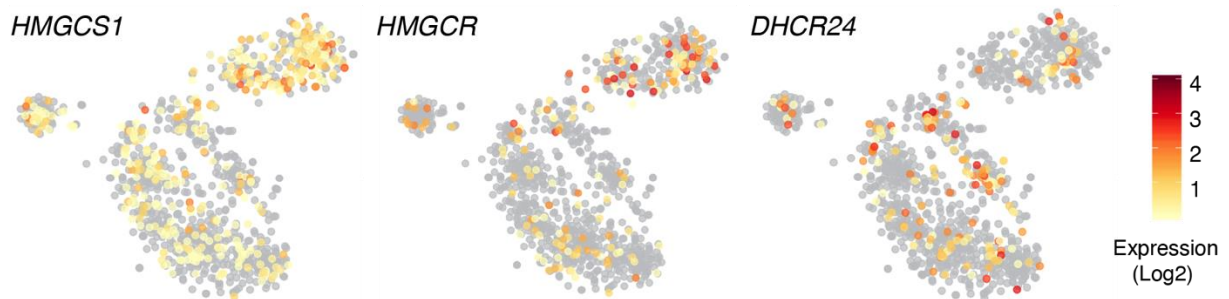**E**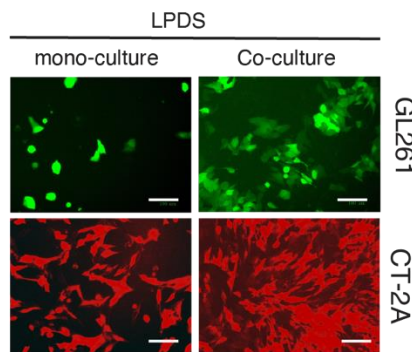**F**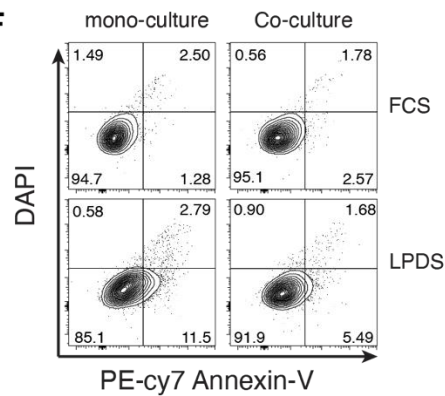

**Supplementary Figure 7. Astrocyte-derived cholesterol support glioma survival.** (A) Scheme of *de-novo* cholesterol synthesis pathway. (B,C) qPCR analyses of *Hmgcs1*, *Hmgcr*, and *Dhcr24* expression in astrocytes treated with GBM-CM (B) or co-incubated for 24h with GL261 (C); expression normalized to *Ppia* ( $n = 4$  biologically independent experiments). (D) Heat map over of the scRNAseq gene expression intensity of *HMGCS1*, *HMGCR*, and *DHC24* in tumor-associated astrocytes from GBM patients<sup>4</sup> (astrocyte cluster as in **Supplementary Fig 3A**). Expression levels are defined by color-coded expression (from yellow to red; Grey indicates that

the transcript was not detected). **(E,F)** Analysis of LPDS-induced glioma cell death, in the presence or absence of primary astrocytes, by Annexin-V assay. **(E)** Representative fluorescent images of murine GFP<sup>+</sup>-GL261 and tdTomato<sup>+</sup>-CT-2A glioma cells were co-cultured with or without primary mouse astrocytes ( $n = 4$  biologically independent experiments). **(F)** Representative flow cytometry plots and quantification analyses of Annexin V/DAPI staining comparing human U87EGFR<sup>vIII</sup><sup>10</sup> glioma cells co-cultured with or human primary astrocytes for 5 days ( $n = 3$  biologically independent experiments). Data are shown as mean  $\pm$  s.e.m.  $P$  values were determined by a two-sided Student's t-test (**B** and **C**). \* $P < 0.05$ , \*\* $P < 0.01$ , \*\*\* $P < 0.001$ .



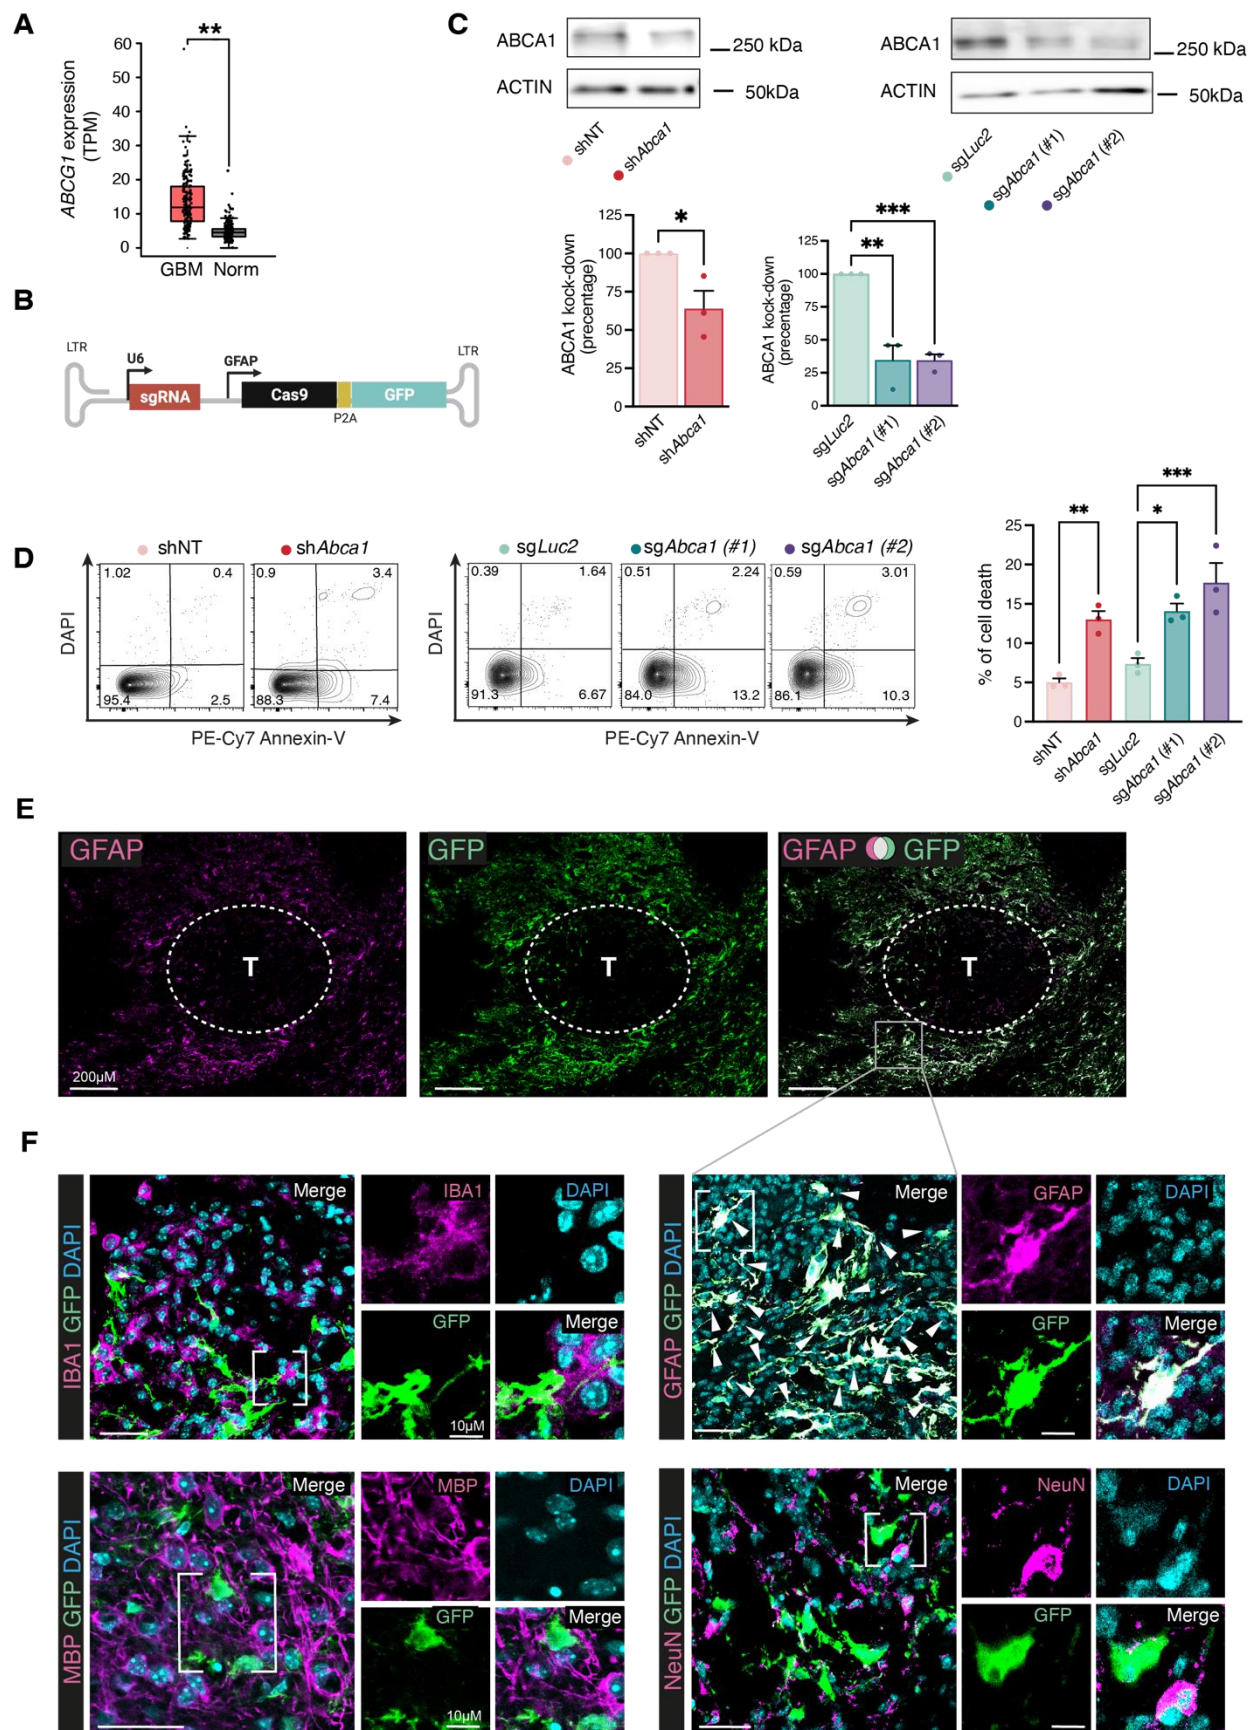

**Supplementary Figure 8. Astrocytic expression of *ABCG1*, *ABCA1*, and astrocyte-specific lentiviruses.** (A) Box plot analysis of TCGA gene expression for *ABCG1* in normal (Norm;  $n=207$ ) or GBM ( $n=163$ ) patients.  $n$  represents the number of patients per group (B-D) Primary astrocytes were transduced with RNAi encoding lentiviruses [Non-targeting shRNA (shNT) or *Abca1*-targeting shRNA (sh*Abca1*); Schematic map of the astrocyte-specific shRNA lentiviral vector in Fig. 6F], Or astrocyte-specific CRISPR-Cas9 lentivirus targeting the luciferase gene (sg*Luc2*; control), or *Abca1* sg*Abca1* (#1) and sg*Abca1* (#2); Schematic map of the astrocyte-specific CRISPR-Cas9-sgRNA lentiviral vector in (B). shRNA and sgRNA sequences are detailed in Supplementary Table 1. Transduced astrocytes were then co-cultured with CT-2A glioma cells in LPDS-media for 5 days, and LPDS-induced glioma cell death was determined by Annexin-V assay. (C) Representative immunoblot and quantification analyses comparing ABCA1 protein levels in transduced astrocytes ( $n = 3$  biologically independent experiments). (D) Representative flow cytometry plots of CT-2A glioma cells co-cultured for 5 days with transduced astrocytes are shown on the left and quantification analyses on the right ( $n = 3$  biologically independent experiments). Data are shown as mean  $\pm$  s.e.m.  $P$  values were determined by a two-sided Student's t-test (C) or by one-way ANOVA (C, D). \* $P<0.05$ , \*\* $P<0.01$ , \*\*\* $P<0.001$ . (E,F) Expression of astrocyte-specific GFP-expressing *Gfap*-shRNA lentiviruses-injected GBM-bearing mice. (E) Representative immunofluorescence images of GFP (green) and GFAP (astrocytes, magenta), scale bars, 400  $\mu$ m (F) Representative immunofluorescence images of GFP expression (green) and cell makers for TAMs (IBA1, magenta), oligodendrocytes (MBP, magenta), astrocytes (GFAP, magenta), or neurons (NeuN, magenta). Colocalization (white) is identified by white arrowheads. Large scale image on the left, insert (white box) on the right. scale bars, 40  $\mu$ m, scale bar for insert 10  $\mu$ m. Data are representative of two independent experiments with  $n = 3$  mice/group.

**Supplementary Table 1. Sequences used for generating ABCA1 RNAi vectors**

| ID | Name                          | Sequence (5'→3')                                                                                                                                                                                                                                                                                                                                                                                                                                                                                                                                                                                                                                                                                                                                  |
|----|-------------------------------|---------------------------------------------------------------------------------------------------------------------------------------------------------------------------------------------------------------------------------------------------------------------------------------------------------------------------------------------------------------------------------------------------------------------------------------------------------------------------------------------------------------------------------------------------------------------------------------------------------------------------------------------------------------------------------------------------------------------------------------------------|
| 1  | shNT <sup>11</sup>            | GAGTGCCACTTTCCGAATAAA                                                                                                                                                                                                                                                                                                                                                                                                                                                                                                                                                                                                                                                                                                                             |
| 2  | shAbca1                       | GCGCGATAGCGCTAATAATTT                                                                                                                                                                                                                                                                                                                                                                                                                                                                                                                                                                                                                                                                                                                             |
| 3  | gfaABC1D                      | GATCTAACATATCCTGGTGTGGAGTAGGGGACGCTGCTCTGACAGAGGCTCGGGGGCCTGA<br>GCTGGCTCTGTGAGCTGGGGAGGAGGCAGACAGCCAGGCCTTGTCTGCAAGCAGACCTGGC<br>AGCATTGGGCTGGCCGCCCCCAGGGCCTCCTCTTCATGCCAGTGAATGACTCACCTTGGC<br>ACAGACACAATGTTCTGGGGTGGGCACAGTGCCTGCTTCCCGCCGCACCCAGCCCCCTCA<br>AATGCCTTCCGAGAAGCCATTGAGCAGGGGGCTTGCAATTGCACCCAGCCTGACAGCCTG<br>GCATCTTGGGATAAAAGCAGCACAGCCCCCTAGGGGCTGCCCTTGCTGTGTGGCGCCACCG<br>GCGGTGGAGAACAAAGGCTCTATTAGCCTGTGCCAGGAAAGGGGATCAGGGGATGCCAG<br>GCATGGACAGTGGGTGGCAGGGGGGAGAGGAGGGCTGTCTGCTTCCAGAAAGTCCAAGGA<br>CACAAATGGGTGAGGGGAGAGCTCTCCCATAGCTGGGCTGCGGCCCAACCCACCCCCTC<br>AGGCTATGCCAGGGGGTGTGGCAGGGGCACCCGGGCATCGCCAGTCTAGCCCACTCCTTC<br>ATAAAGCCCTCGCATCCCAGGAGCGAGCAGAGCCAGAGCAGGTTGGAGAGGAGACGCATCA<br>CCTCCGCTGCTCGCA |
| 4  | sgLuc2 <sup>12</sup>          | CACCGTTGGCGCTCAACTTTTACGA                                                                                                                                                                                                                                                                                                                                                                                                                                                                                                                                                                                                                                                                                                                         |
| 5  | SgAbca1 (#1)                  | CACCGGAGAGTCACTCACCCGGACA                                                                                                                                                                                                                                                                                                                                                                                                                                                                                                                                                                                                                                                                                                                         |
| 6  | sgAbca1 (#2)                  | CACCGTTGGCGCTCAACTTTTACGA                                                                                                                                                                                                                                                                                                                                                                                                                                                                                                                                                                                                                                                                                                                         |
| 7  | sgRNA<br>sequencing<br>primer | TACGTGACGTAGAAAGTA                                                                                                                                                                                                                                                                                                                                                                                                                                                                                                                                                                                                                                                                                                                                |

**Supplementary Table 2. Functional enrichment analysis of tumor-associated astrocytes**

| ID | Term ID    | Term Name                                                               | P <sub>adj</sub>        |
|----|------------|-------------------------------------------------------------------------|-------------------------|
| 1  | GO:0007049 | Cell cycle                                                              | 2.810x10 <sup>-17</sup> |
| 2  | GO:0008152 | Metabolic process                                                       | 7.455x10 <sup>-18</sup> |
| 3  | GO:0022402 | Cell cycle process                                                      | 3.882x10 <sup>-19</sup> |
| 4  | GO:0034097 | Response to cytokine                                                    | 5.456x10 <sup>-19</sup> |
| 5  | GO:0044237 | Cellular metabolic process                                              | 7.852x10 <sup>-19</sup> |
| 6  | GO:0065009 | Regulation of molecular function                                        | 1.892x10 <sup>-17</sup> |
| 7  | GO:0071345 | Cellular response to cytokine stimulus                                  | 6.642x10 <sup>-18</sup> |
| 8  | GO:0071840 | Cellular component organization or biogenesis                           | 1.606x10 <sup>-26</sup> |
| 9  | GO:1903047 | Mitotic cell cycle process                                              | 7.675x10 <sup>-17</sup> |
| 10 | GO:0000278 | Mitotic cell cycle                                                      | 1.572x10 <sup>-14</sup> |
| 11 | GO:0006950 | Response to stress                                                      | 1.257x10 <sup>-15</sup> |
| 12 | GO:0010646 | Regulation of cell communication                                        | 5.250x10 <sup>-16</sup> |
| 13 | GO:0071704 | Organic substance metabolic process                                     | 9.935x10 <sup>-15</sup> |
| 14 | GO:0002376 | Immune system process                                                   | 1.398x10 <sup>-11</sup> |
| 15 | GO:0006807 | Nitrogen compound metabolic process                                     | 1.895x10 <sup>-13</sup> |
| 16 | GO:0006725 | Cellular aromatic compound metabolic process                            | 1.421x10 <sup>-12</sup> |
| 17 | GO:0006139 | Nucleobase-containing compound metabolic process                        | 2.368x10 <sup>-12</sup> |
| 18 | GO:0009893 | Positive regulation of metabolic process                                | 9.465x10 <sup>-14</sup> |
| 19 | GO:0010604 | Positive regulation of macromolecule metabolic process                  | 4.478x10 <sup>-12</sup> |
| 20 | GO:0031325 | Positive regulation of cellular metabolic process                       | 1.258x10 <sup>-11</sup> |
| 21 | GO:0034641 | Cellular nitrogen compound metabolic process                            | 1.218x10 <sup>-11</sup> |
| 22 | GO:0044238 | Primary metabolic process                                               | 4.418x10 <sup>-12</sup> |
| 23 | GO:0046483 | Heterocycle metabolic process                                           | 4.138x10 <sup>-13</sup> |
| 24 | GO:0051173 | Positive regulation of nitrogen compound metabolic process              | 9.325x10 <sup>-12</sup> |
| 25 | GO:0001816 | Cytokine production                                                     | 2.656x10 <sup>-10</sup> |
| 26 | GO:0002682 | Regulation of immune system process                                     | 6.102x10 <sup>-11</sup> |
| 27 | GO:0006952 | Defense response                                                        | 1.819x10 <sup>-8</sup>  |
| 28 | GO:0006260 | DNA replication                                                         | 9.952x10 <sup>-9</sup>  |
| 29 | GO:0001819 | Positive regulation of cytokine production                              | 7.640x10 <sup>-8</sup>  |
| 30 | GO:0006261 | DNA-dependent DNA replication                                           | 7.931x10 <sup>-7</sup>  |
| 31 | GO:0008283 | Cell population proliferation                                           | 6.102x10 <sup>-8</sup>  |
| 32 | GO:0010547 | Positive regulation of cell communication                               | 4.337x10 <sup>-9</sup>  |
| 33 | GO:0031347 | Regulation of defense response                                          | 2.701x10 <sup>-10</sup> |
| 34 | GO:0031349 | Positive regulation of defense response                                 | 2.801x10 <sup>-8</sup>  |
| 35 | GO:0035458 | Cellular response to interferon-beta                                    | 1.396x10 <sup>-7</sup>  |
| 36 | GO:0044260 | Cellular macromolecule metabolic process                                | 4.949x10 <sup>-8</sup>  |
| 37 | GO:0044770 | Cell cycle phase transition                                             | 2.302x10 <sup>-9</sup>  |
| 38 | GO:0044085 | Cellular component biogenesis                                           | 2.027x10 <sup>-10</sup> |
| 39 | GO:0043170 | Macromolecule metabolic process                                         | 2.001x10 <sup>-10</sup> |
| 40 | GO:0051301 | Cell division                                                           | 1.971x10 <sup>-9</sup>  |
| 41 | GO:0051726 | Regulation of cell cycle                                                | 2.324x10 <sup>-8</sup>  |
| 42 | GO:0090304 | Nucleic acid metabolic process                                          | 1.122x10 <sup>-10</sup> |
| 43 | GO:1901987 | Regulation of cell cycle phase transition                               | 7.436x10 <sup>-8</sup>  |
| 44 | GO:1901990 | Regulation of mitotic cell cycle phase transition                       | 1.709x10 <sup>-7</sup>  |
| 45 | GO:0045935 | Positive regulation of nucleobase-containing compound metabolic process | 2.624x10 <sup>-7</sup>  |
| 46 | GO:0042127 | Regulation of cell population proliferation                             | 4.890x10 <sup>-7</sup>  |
| 47 | GO:0034645 | Cellular macromolecule biosynthetic process                             | 3.575x10 <sup>-6</sup>  |
| 48 | GO:0033993 | Response to lipid                                                       | 7.113x10 <sup>-6</sup>  |
| 49 | GO:0031323 | Regulation of cellular metabolic process                                | 6.053x10 <sup>-6</sup>  |
| 50 | GO:0019222 | Regulation of metabolic process                                         | 1.206x10 <sup>-6</sup>  |
| 51 | GO:0008284 | Positive regulation of cell population proliferation                    | 2.054x10 <sup>-5</sup>  |
| 52 | GO:0002263 | Cell activated involved in immune response                              | 5.501x10 <sup>-5</sup>  |
| 53 | GO:0000280 | Nuclear division                                                        | 1.370x10 <sup>-6</sup>  |
| 54 | GO:0000082 | G1/S transition of mitotic cell cycle                                   | 1.451x10 <sup>-4</sup>  |
| 55 | GO:0002697 | Regulation of immune effector process                                   | 1.190x10 <sup>-4</sup>  |
| 56 | GO:0006955 | Immune response                                                         | 9.476x10 <sup>-4</sup>  |
| 57 | GO:0008608 | Attachment of spindle microtubules to kinetochore                       | 3.878x10 <sup>-3</sup>  |
| 58 | GO:0019221 | Cytokine-mediated signaling pathway                                     | 2.007x10 <sup>-4</sup>  |
| 59 | GO:0030335 | Positive regulation of cell migration                                   | 9.829x10 <sup>-5</sup>  |
| 60 | GO:0032270 | Positive regulation of cellular protein metabolic process               | 7.465x10 <sup>-5</sup>  |
| 61 | GO:0050776 | Regulation of immune response                                           | 1.550x10 <sup>-5</sup>  |
| 62 | GO:0060255 | Regulation of macromolecule metabolic process                           | 1.416x10 <sup>-6</sup>  |
| 63 | GO:0060759 | Regulation of response to cytokine stimulus                             | 6.124x10 <sup>-5</sup>  |
| 64 | GO:0080090 | Regulation of primary metabolic process                                 | 2.290x10 <sup>-5</sup>  |
| 65 | GO:1902806 | Regulation of cell cycle G1/S phase transition                          | 3.190x10 <sup>-3</sup>  |
| 66 | GO:0140014 | Mitotic nuclear division                                                | 1.703x10 <sup>-5</sup>  |

|    |            |                                                      |                        |
|----|------------|------------------------------------------------------|------------------------|
| 67 | GO:0060760 | Positive regulation of response to cytokine stimulus | $1.187 \times 10^{-3}$ |
| 68 | GO:0051247 | Positive regulation of protein metabolic process     | $3.679 \times 10^{-4}$ |
| 69 | GO:0010556 | Regulation of macromolecule biosynthetic process     | $3.854 \times 10^{-4}$ |
| 70 | GO:0006091 | Generation of precursor metabolites and energy       | $5.548 \times 10^{-4}$ |

**Supplementary Table 2.** Functional enrichment analysis of differently regulated transcripts from tumor-associated astrocytes based on Gene Ontology (GO).

**Supplementary Table 3. Functional enrichment analysis of human tumor-associated astrocytes**

| ID | Term ID       | Term Name                                                                                                                   | ES       | FDR     |
|----|---------------|-----------------------------------------------------------------------------------------------------------------------------|----------|---------|
| 1  | R-HSA-3656243 | Defective ST3GAL3 causes MCT12 and EIEE15                                                                                   | 0.98662  | 0.03965 |
| 2  | R-HSA-191273  | Cholesterol biosynthesis                                                                                                    | 0.64482  | 0.03965 |
| 3  | R-HSA-389661  | Glyoxylate metabolism and glycine degradation                                                                               | 0.63704  | 0.03965 |
| 4  | R-HSA-6799198 | Complex I biogenesis                                                                                                        | 0.55068  | 0.03965 |
| 5  | R-HSA-163200  | Respiratory electron transport, ATP synthesis by chemiosmotic coupling, and heat production by uncoupling proteins.         | 0.5376   | 0.03965 |
| 6  | R-HSA-611105  | Respiratory electron transport                                                                                              | 0.5357   | 0.03965 |
| 7  | R-HSA-1655829 | Regulation of cholesterol biosynthesis by SREBP (SREBF)                                                                     | 0.52005  | 0.03965 |
| 8  | R-HSA-2426168 | Activation of gene expression by SREBF (SREBP)                                                                              | 0.51517  | 0.03965 |
| 9  | R-HSA-1428517 | The citric acid (TCA) cycle and respiratory electron transport                                                              | 0.43726  | 0.03965 |
| 10 | R-HSA-168249  | Innate Immune System                                                                                                        | -0.30387 | 0.03965 |
| 11 | R-HSA-9006934 | Signaling by Receptor Tyrosine Kinases                                                                                      | -0.33193 | 0.03965 |
| 12 | R-HSA-372790  | Signaling by GPCR                                                                                                           | -0.33459 | 0.03965 |
| 13 | R-HSA-196854  | Metabolism of vitamins and cofactors                                                                                        | -0.38108 | 0.03965 |
| 14 | R-HSA-425407  | SLC-mediated transmembrane transport                                                                                        | -0.39824 | 0.03965 |
| 15 | R-HSA-1280215 | Cytokine Signaling in Immune system                                                                                         | -0.39854 | 0.03965 |
| 16 | R-HSA-913531  | Interferon Signaling                                                                                                        | -0.42312 | 0.03965 |
| 17 | R-HSA-373760  | LICAM interactions                                                                                                          | -0.42924 | 0.03965 |
| 18 | R-HSA-449147  | Signaling by Interleukins                                                                                                   | -0.44046 | 0.03965 |
| 19 | R-HSA-500792  | GPCR ligand binding                                                                                                         | -0.45853 | 0.03965 |
| 20 | R-HSA-373755  | Semaphorin interactions                                                                                                     | -0.46668 | 0.03965 |
| 21 | R-HSA-6806834 | Signaling by MET                                                                                                            | -0.51052 | 0.03965 |
| 22 | R-HSA-76005   | Response to elevated platelet cytosolic Ca2+                                                                                | -0.53623 | 0.03965 |
| 23 | R-HSA-909733  | Interferon alpha/beta signaling                                                                                             | -0.53748 | 0.03965 |
| 24 | R-HSA-3000178 | ECM proteoglycans                                                                                                           | -0.58288 | 0.03965 |
| 25 | R-HSA-3000171 | Non-integrin membrane-ECM interactions                                                                                      | -0.60099 | 0.03965 |
| 26 | R-HSA-202733  | Cell surface interactions at the vascular wall                                                                              | -0.60219 | 0.03965 |
| 27 | R-HSA-373076  | Class A/I (Rhodopsin-like receptors)                                                                                        | -0.61315 | 0.03965 |
| 28 | R-HSA-1566948 | Elastic fibre formation                                                                                                     | -0.62358 | 0.03965 |
| 29 | R-HSA-1474244 | Extracellular matrix organization                                                                                           | -0.62407 | 0.03965 |
| 30 | R-HSA-375276  | Peptide ligand-binding receptors                                                                                            | -0.63294 | 0.03965 |
| 31 | R-HSA-6785807 | Interleukin-4 and Interleukin-13 signaling                                                                                  | -0.63426 | 0.03965 |
| 32 | R-HSA-400685  | Sema4D in semaphorin signaling                                                                                              | -0.63503 | 0.03965 |
| 33 | R-HSA-381426  | Regulation of Insulin-like Growth Factor (IGF) transport and uptake by Insulin-like Growth Factor Binding Proteins (IGFBPs) | -0.64225 | 0.03965 |
| 34 | R-HSA-9645723 | Diseases of programmed cell death                                                                                           | -0.65146 | 0.03965 |
| 35 | R-HSA-8875878 | MET promotes cell motility                                                                                                  | -0.65289 | 0.03965 |
| 36 | R-HSA-1442490 | Collagen degradation                                                                                                        | -0.65325 | 0.03965 |
| 37 | R-HSA-6783589 | Interleukin-6 family signaling                                                                                              | -0.65494 | 0.03965 |
| 38 | R-HSA-877300  | Interferon gamma signaling                                                                                                  | -0.66473 | 0.03965 |
| 39 | R-HSA-76009   | Platelet Aggregation (Plug Formation)                                                                                       | -0.6806  | 0.03965 |
| 40 | R-HSA-1474228 | Degradation of the extracellular matrix                                                                                     | -0.68368 | 0.03965 |
| 41 | R-HSA-449836  | Other interleukin signaling                                                                                                 | -0.68368 | 0.03965 |
| 42 | R-HSA-210991  | Basigin interactions                                                                                                        | -0.68665 | 0.03965 |
| 43 | R-HSA-3000170 | Syndecan interactions                                                                                                       | -0.69992 | 0.03965 |
| 44 | R-HSA-3000157 | Laminin interactions                                                                                                        | -0.71571 | 0.03965 |
| 45 | R-HSA-8874081 | MET activates PTK2 signaling                                                                                                | -0.7177  | 0.03965 |
| 46 | R-HSA-1650814 | Collagen biosynthesis and modifying enzymes                                                                                 | -0.71836 | 0.03965 |
| 47 | R-HSA-8948216 | Collagen chain trimerization                                                                                                | -0.73086 | 0.03965 |
| 48 | R-HSA-198933  | Immunoregulatory interactions between a Lymphoid and a non-Lymphoid cell                                                    | -0.73656 | 0.03965 |
| 49 | R-HSA-1474290 | Collagen formation                                                                                                          | -0.73969 | 0.03965 |
| 50 | R-HSA-5357786 | TNFR1-induced proapoptotic signaling                                                                                        | -0.74918 | 0.03965 |
| 51 | R-HSA-446353  | Cell-extracellular matrix interactions                                                                                      | -0.77086 | 0.03965 |
| 52 | R-HSA-216083  | Integrin cell surface interactions                                                                                          | -0.77262 | 0.03965 |
| 53 | R-HSA-196807  | Nicotinate metabolism                                                                                                       | -0.77888 | 0.03965 |
| 54 | R-HSA-2022090 | Assembly of collagen fibrils and other multimeric structures                                                                | -0.79098 | 0.03965 |
| 55 | R-HSA-197264  | Nicotinamide salvaging                                                                                                      | -0.8154  | 0.03965 |
| 56 | R-HSA-6783783 | Interleukin-10 signaling                                                                                                    | -0.885   | 0.03965 |
| 57 | R-HSA-380108  | Chemokine receptors bind chemokines                                                                                         | -0.91066 | 0.03965 |
| 58 | R-HSA-2243919 | Crosslinking of collagen fibrils                                                                                            | -0.93    | 0.03965 |
| 59 | R-HSA-173736  | Alternative complement activation                                                                                           | -0.9999  | 0.03965 |
| 60 | R-HSA-6799990 | Metal sequestration by antimicrobial proteins                                                                               | -1       | 0.03965 |

**Supplementary Table 3.** Functional enrichment analysis of differently regulated transcripts from human tumor-associated astrocytes<sup>4</sup> based on the Reactome database. ES - enrichment score comparing the two clusters, FDR - false discovery rate. FDR<0.05.



## Supplementary References

1. Buch T, Heppner FL, Tertilt C, *et al.* A Cre-inducible diphtheria toxin receptor mediates cell lineage ablation after toxin administration. *Nat Methods*. Jun 2005;2(6):419-26.  
doi:10.1038/nmeth762
2. Schreiner B, Romanelli E, Liberski P, *et al.* Astrocyte Depletion Impairs Redox Homeostasis and Triggers Neuronal Loss in the Adult CNS. *Cell Rep*. Sep 1 2015;12(9):1377-84. doi:10.1016/j.celrep.2015.07.051
3. Takenaka MC, Gabriely G, Rothhammer V, *et al.* Control of tumor-associated macrophages and T cells in glioblastoma via AHR and CD39. *Nat Neurosci*. May 2019;22(5):729-740. doi:10.1038/s41593-019-0370-y
4. Darmanis S, Sloan SA, Croote D, *et al.* Single-Cell RNA-Seq Analysis of Infiltrating Neoplastic Cells at the Migrating Front of Human Glioblastoma. *Cell Rep*. Oct 31 2017;21(5):1399-1410. doi:10.1016/j.celrep.2017.10.030
5. Wu YE, Pan L, Zuo Y, Li X, Hong W. Detecting Activated Cell Populations Using Single-Cell RNA-Seq. *Neuron*. Oct 11 2017;96(2):313-329 e6.  
doi:10.1016/j.neuron.2017.09.026
6. Zhong S, Zhang S, Fan X, *et al.* A single-cell RNA-seq survey of the developmental landscape of the human prefrontal cortex. *Nature*. Mar 22 2018;555(7697):524-528.  
doi:10.1038/nature25980
7. Collardeau-Frachon S, Scoazec JY. Vascular development and differentiation during human liver organogenesis. *Anat Rec (Hoboken)*. Jun 2008;291(6):614-27. doi:10.1002/ar.20679

8. Kambach DM, Halim AS, Cauer AG, *et al.* Disabled cell density sensing leads to dysregulated cholesterol synthesis in glioblastoma. *Oncotarget*. Feb 28 2017;8(9):14860-14875. doi:10.18632/oncotarget.14740
9. Lin L, Desai R, Wang X, Lo EH, Xing C. Characteristics of primary rat microglia isolated from mixed cultures using two different methods. *J Neuroinflammation*. May 8 2017;14(1):101. doi:10.1186/s12974-017-0877-7
10. Villa GR, Hulce JJ, Zanca C, *et al.* An LXR-Cholesterol Axis Creates a Metabolic Co-Dependency for Brain Cancers. *Cancer Cell*. Nov 14 2016;30(5):683-693. doi:10.1016/j.ccell.2016.09.008
11. Mayo L, Trauger SA, Blain M, *et al.* Regulation of astrocyte activation by glycolipids drives chronic CNS inflammation. *Nat Med*. Oct 2014;20(10):1147-56. doi:10.1038/nm.3681
12. Hart T, Chandrashekar M, Aregger M, *et al.* High-Resolution CRISPR Screens Reveal Fitness Genes and Genotype-Specific Cancer Liabilities. *Cell*. Dec 3 2015;163(6):1515-26. doi:10.1016/j.cell.2015.11.015
